1 Genomic signals found using RNA sequencing support conservation of walleye (*Sander vitreus*)  
2 in a large freshwater ecosystem.

3 Matt J. Thorstensen<sup>1</sup>, Jennifer D. Jeffrey<sup>1</sup>, Jason R. Treberg<sup>1</sup>, Douglas A. Watkinson<sup>1</sup>, Eva C.  
4 Enders<sup>2</sup>, & Ken M. Jeffries<sup>1</sup>

5 <sup>1</sup>Department of Biological Sciences, University of Manitoba, Winnipeg, Canada

6 <sup>2</sup>Freshwater Institute, Fisheries and Oceans Canada, Winnipeg, Canada

## 7 **Abstract**

8 RNA sequencing is an effective approach for studying an aquatic species with little prior  
9 molecular information available, yielding both physiological and genomic data, but its genetic  
10 applications are not well-characterized. We investigate this possible role for RNA sequencing for  
11 population genomics in Lake Winnipeg, Manitoba, Canada, walleye (*Sander vitreus*). Lake  
12 Winnipeg walleye represent the largest component of the second-largest freshwater fishery in  
13 Canada. In the present study, large female walleye were sampled via nonlethal gill biopsy over  
14 two years at three spawning sites representing a latitudinal gradient in the lake. Genetic variation  
15 from sequenced messenger RNA was analyzed for neutral and adaptive markers to investigate  
16 population structure and possible adaptive variation. We find low population divergence ( $F_{ST} =$   
17 0.0095), possible northward gene flow, and outlier loci that vary latitudinally in transcripts  
18 associated with cell membrane proteins and cytoskeletal function. These results indicate that  
19 Lake Winnipeg walleye may be effectively managed as a single demographically connected  
20 metapopulation with contributing subpopulations, and suggest genomic differences possibly  
21 underlying observed phenotypic differences. Because RNA sequencing data can yield

22 physiological in addition to genetic information discussed here, we argue that it is useful for  
23 addressing diverse molecular questions in the conservation of freshwater species.

24 **Key Words:** outlier loci, gene flow, population genomics, adaptive variation, transcriptomics

## 25 **Introduction**

26 Population abundances in aquatic systems are in decline globally, with a 36% decline in  
27 the marine Living Planet Index (LPI, <http://livingplanetindex.org>) between 1970 and 2012, and  
28 an 81% decline in the freshwater LPI during the same period (WWF 2016). These estimates are  
29 especially alarming for freshwater ecosystems, which cover 2.3% of the earth’s global land  
30 surface area but are disproportionately high in species richness—for instance, one-third of all  
31 described vertebrate species live in freshwater (Reid et al. 2019; WWF 2018). It is therefore a  
32 significant concern that freshwater species are declining in abundance more rapidly than  
33 terrestrial or marine species (Reid et al. 2019). This decline underscores an urgent need for  
34 research supporting conservation efforts for these diverse freshwater species.

35 To take effective action, conservation practitioners require research on the environmental  
36 stressors a population faces, as well as population structure and evolutionary patterns to  
37 determine a species’ adaptive potential (Connon et al. 2018; Russello et al. 2011; Waples &  
38 Gaggiotti 2006). Transcriptomics has been discussed in the context of differential gene  
39 expression, for identifying important physiological thresholds in species of conservation concern  
40 that can support risk assessments and setting management thresholds, thus, ultimately benefiting  
41 species conservation (Connon et al. 2018). An advantage of using RNA sequencing for  
42 conservation research is that it provides information about both genetics and molecular  
43 physiology by returning transcript abundances and single nucleotide polymorphisms (SNPs)

44 allowing researchers to gather a diverse array of information within one data set. These  
45 advantages make transcriptomics approaches useful for studying species of conservation  
46 concern, especially for species that do not have extensive molecular databases like those  
47 available for model species (e.g., zebrafish, *Danio rerio*).

48 Applications for transcriptomics to address population genomics questions in non-model  
49 species is relatively poorly characterized. A large topic of interest in conservation genomics is  
50 population structure, or genomic divergence between different groups of individuals, which can  
51 support decisions on whether those groups should be managed as a single or several units (Funk  
52 et al. 2012). Complementary to population structure analyses, outlier SNP detection may reveal  
53 adaptive variation useful for conservation (Funk et al. 2012; Russello et al. 2011). While many  
54 genomic methods rely on genes in linkage with outlier SNPs of interest to interpret the functional  
55 significance of data, the functional significance of SNPs in mRNA is more readily interpretable  
56 because those SNPs may represent *cis*-regulatory mechanisms within an annotated transcript  
57 (Verta & Jones 2019). Within a transcript, the effects of SNPs in open reading frames can be  
58 predicted, indicating how protein function may be modified by genetic variation (Cingolani et al  
59 2012). Therefore, RNA sequencing may be an effective method for characterizing physiological  
60 patterns, population structure, and adaptive variation in species and systems with little prior  
61 information available.

62 Walleye (*Sander vitreus*) in Lake Winnipeg, Manitoba, are the largest component of the  
63 second largest freshwater fishery in Canada. Lake Winnipeg is characterized by a north and a  
64 south basin connected by a narrow channel (Johnston et al. 2012; Figure 1). While previous  
65 microsatellite research showed slight population differentiation between groups in each basin  
66 (Backhouse-James & Docker 2011), morphological, life history, dietary, and environmental

67 differences among Lake Winnipeg walleye suggest diverging genetic histories (Environment  
68 Canada 2011; Johnson et al. 2012; Moles et al. 2010; Sheppard et al. 2015, Sheppard et al. 2018;  
69 Watkinson & Gillis 2005). Within Lake Winnipeg, walleye have shown declining biomass and  
70 body condition, decreased catches, and commercial harvests above maximum sustainable yields  
71 for several years (Manitoba Government 2018; Manitoba Sustainable Development 2018).  
72 Observations of dwarf walleye suggest signs of selection against large, economically desirable  
73 fish (Johnston et al. 2012; Moles et al. 2010). These trends highlight the need to gain information  
74 on population structure and biological differences in Lake Winnipeg walleye to support future  
75 conservation efforts.

76         The current study aimed to show how mRNA sequencing can be an effective approach  
77 for developing critical pieces of information directly applicable to fisheries and conservation  
78 practitioners. We used RNA sequencing for genetic characterization of Lake Winnipeg walleye  
79 sampled from known spawning locations that potentially represent fish from the north and south  
80 basins. We also sampled fish collected at the channel that connects the north and south basins as  
81 an intermediate site. We hypothesized that walleye populations within Lake Winnipeg show  
82 evidence of distinct population differentiation identified using RNA sequencing data, despite the  
83 weak signatures from microsatellite data (Backhouse-James & Docker 2011). We predicted that  
84 the walleye population divergence may partially reflect the different environments and natural  
85 histories between the north and south basins of Lake Winnipeg.

## 86 **Methods**

### 87 *RNA extraction and sequencing*

88 Gill tissue was collected from large ( $\geq 1.2$  kg) predominately female (44 female, 4 unidentified  
89 sex) (Supplementary Table 1) walleye over two years from three sites in the Lake Winnipeg  
90 system (Red River, Matheson Island, and Dauphin River, representing sites in the south basin,  
91 channel, and north basin, respectively; Figure 1; Supplementary Table 1;  $n = 8$  per year and site,  
92  $n = 48$  total). These fish were sampled during the spawning season (approximately May through  
93 early June in 2017 and 2018). Walleye were collected by electrofishing, held in a live well for no  
94 longer than one hour, and anaesthetized using a Portable Electroanesthesia System (PES™, Smith  
95 Root, Vancouver, Washington, USA) in accordance with approved animal use protocols of  
96 Fisheries and Oceans Canada (FWI-ACC-2017-001, FWI-ACC-2018-001), the University of  
97 Manitoba (F2018-019) and the University of Nebraska-Lincoln (Project ID: 1208). Fish were  
98 sampled non-lethally for gill tissue, where 2–3 mm of the terminal ends of 3–4 filaments from  
99 the left side each fish were collected and placed in *RNAlater* (Thermo Fisher Scientific,  
100 Waltham, Massachusetts, USA) that was kept at 4 °C for 24 h prior to storage at -80 °C. As part  
101 of a larger study on the physiological status and movement of Lake Winnipeg walleye, other  
102 samples collected were the first dorsal spine, scales, blood, a muscle biopsy, and fin clips. Fish  
103 were surgically implanted with VEMCO acoustic tags prior to release (VEMCO, Bedford, Nova  
104 Scotia, Canada). For the purposes of the present study, only gill tissue was analyzed. Total RNA  
105 extractions were performed on gill tissue using RNeasy Plus Mini Prep Kits (QIAGEN, Venlo,  
106 Netherlands) following manufacturer's protocols, with minor modifications (provided in the  
107 supplementary materials).

108 The quantity and quality of RNA was assessed with a Nanodrop One Spectrophotometer  
109 (Thermo Fisher) and electrophoresis on a 1% agarose gel, respectively. Total RNA was  
110 normalized to 80 ng  $\mu\text{L}^{-1}$  and sent to the McGill University and Génome Québec Innovation

111 Centre sequencing facility (<http://gqinnovationcenter.com>) for cDNA library preparation and  
112 sequencing. Total RNA was used to prepare 48 separate cDNA libraries to produce 100 base pair  
113 paired end reads using the NEBNext Ultra II Directional RNA Library Prep Kit for Illumina  
114 (New England Biolabs, Ipswich, Massachusetts, USA). Each library was individually barcoded  
115 with NEBNext dual adaptors (New England Biolabs) prior to sequencing. All 48 fish were  
116 sequenced on a single lane of a NovaSeq 6000 (Illumina, San Diego, California, USA). 2.17  
117 billion reads total were sequenced, with an average of 45,225,548 reads per sample collected  
118 (5,071,090 s.d.) (Supplementary Table 1).

### 119 *SNP calling*

120 Raw read files were uploaded to the Graham and Cedar clusters on the Westgrid section  
121 of the Compute Canada partnership (<https://www.westgrid.ca/>). Read files were checked for  
122 quality using FastQC version 0.11.8 (Andrews 2010) and trimmed using Trimmomatic version  
123 0.36 (Bolger et al. 2014). When using FastQC version 0.11.8 (Andrews 2010), the program was  
124 set to allow two seed mismatches, a palindrome clip threshold of 30 nucleotides, and simple clip  
125 threshold of ten nucleotides. A sliding window size of 4 base pairs was used to filter data for a  
126 minimum Phred 64 quality of five, with five nucleotides trimmed from both the leading and  
127 trailing ends of reads, and a minimum read length of 36. After trimming, FastQC was used again  
128 to verify data quality. Scripts used for the analyses in this manuscript are provided at  
129 [https://github.com/BioMatt/Walleye\\_RNAseq](https://github.com/BioMatt/Walleye_RNAseq).

130 The SuperTranscripts pipeline was used to align reads (Davidson et al. 2017) for SNP  
131 calling. First, Salmon version 0.11.3 (Patro et al. 2017) was used to quantify read counts, as  
132 compared to a previously assembled reference transcriptome for walleye (Sequence Read  
133 Archive Accession SRP150633; Jeffrey et al, in revision). In Salmon, validate mappings, range

134 factorization bins of size 4, sequencing bias, and GC bias options were all used, along with  
135 dumping equivalence classes for subsequent steps. Using the count estimates from Salmon,  
136 Corset version 1.07 (Davidson & Oshlack 2014) was used to cluster the data for assembly into  
137 SuperTranscripts. A linear representation of the transcriptome was constructed with Lace version  
138 1.00 (<https://github.com/Oshlack/Lace>) using information from Corset and the original  
139 transcriptome, where 263,272 genes from the original transcriptome were gathered into 148,165  
140 super clusters. Following Lace, STAR version 2.7.0a (Dobin et al. 2013) was used in 2-pass  
141 mode to align trimmed reads to the reassembled transcriptome. Here, annotated junctions from  
142 Lace were provided along with the new transcriptome, and sjdbOverhang of 99 was chosen  
143 following recommended settings of 1 base pair below read length. A minimum of 79.6% reads  
144 uniquely mapped to the Lace-clustered transcriptome (mean  $81.5\% \pm 0.5\%$  s.d.) (Supplementary  
145 Table 1).

146         For calling SNPs, the STAR-aligned reads were processed with Picard version 2.18.9 by  
147 adding read groups, splitting cigar ends, and merging bam files (Broad Institute 2018), then  
148 SNPs were called using FreeBayes version 1.2.0 (Garrison & Marth 2012). Detailed methods for  
149 calling SNPs are provided in the Supplementary Materials. We filtered the VCF file from  
150 FreeBayes in two ways. This resulted in 2,458,947 SNPs and 586,556 indels, which were used as  
151 unfiltered data for subsequent steps. To study SNPs as close to neutrality as possible, we used  
152 vcftools version 0.1.14 (Danecek et al. 2011) to filter for biallelic SNPs of genotype and site  
153 quality 30 with a minor allele frequency of 0.05 with no missing data, in Hardy-Weinberg  
154 Equilibrium with a  $p$ -value  $< 0.005$ . SNPRelate version 1.16.0 (Zheng et al. 2012) was then used  
155 to prune SNPs for linkage disequilibrium at a threshold of 0.20, where super clusters were coded  
156 as chromosomes for the purposes of linkage disequilibrium pruning. These steps resulted in a

157 putatively neutral data set of 52,372 SNPs used for population structure analyses. For a broader  
158 subset of SNPs for which neutrality was not assumed, vcftools was used to filter for genotype  
159 and site with quality 30, minor allele frequency 0.05, and a maximum of two missing genotypes  
160 out of 48 possible. 222,634 SNPs were retained from these filtering steps, which were then used  
161 for outlier tests and functional analyses.

## 162 *Population structure*

163 To investigate population structure using the 52,372 putatively neutral SNPs, we used a  
164 combination of exploratory analyses, either with no prior information or with sampling location  
165 provided as priors, and population reassignment and differentiation tests to find genetic clusters  
166 despite possible signals of admixture or gene flow. Structure version 2.3.4 (Falush et al. 2003;  
167 Falush et al. 2007; Hubisz et al. 2009; Pritchard et al. 2000) was run with no prior location or  
168 population information, an initial value of alpha of 1.0, a maximum value of alpha of 10.0, prior  
169 mean  $F_{ST}$  of 0.01, lambda of 1.0, a burn in period of 10,000 repetitions, and 110,000 Markov  
170 Chain Monte Carlo repetitions after burn in. Structure plots were visualized with pophelper  
171 version 2.2.7 (<http://royfrancis.github.io/pophelper/>). Ten replicates of  $K = 2-5$  were tested.

172 For analyses performed in R (R Core Team 2019), the package vcfR was used to format  
173 genotype data for use with other programs (Knaus & Grünwald 2017). Adegnet version 2.1.1  
174 (Jombart et al. 2010) was used in two ways. First, in an exploratory capacity to perform  
175 Discriminant Analysis of Principal Components (DAPC), where sampling location was provided  
176 for the DAPC as prior population information. Second, population structure was investigated  
177 irrespective of sampling location by using cluster identification from successive K-means, as  
178 implemented in the find.clusters function in Adegnet. Here, different numbers of clusters were  
179 explored in the data (40 principal components were retained for exploratory steps) and evaluated



180 with a Bayesian Information Criterion (BIC), where the most well-supported number of clusters  
181 with lowest BIC was 2 (Supplementary Figure 1). In addition to exploring the two clusters, the  
182 population assignments from three clusters were used to explore genetic differentiation in the  
183 data because fish were sampled from three sites (Supplementary Table 1). With Hierfstat version  
184 0.04-22 (Yang 1998; Weir & Cockerham 1984), the Weir & Cockerham's pairwise  $F_{ST}$  was  
185 calculated among the three sampling locations, then between the two reassigned clusters  
186 described by Adegenet (Supplementary Table 1). We generated 95% confidence intervals for  
187 these  $F_{ST}$  values in Hierfstat using a bootstrap approach over 1,000 iterations.

188 To visualize population differentiation, we used a PCA as implemented in Adegenet  
189 version 2.1.1 (Jombart et al. 2010) and t-SNE as implemented in Rtsne version 0.15 (van der  
190 Maaten & Hinton 2008). For the t-SNE, two final dimensions were used, with 100 initial  
191 dimensions, 15 perplexity, theta of 0.5, and 5,000 iterations. These approaches were used with  
192 the same settings applied to the putatively neutral SNPs, and visualizations were thus comparable  
193 between data sets.

#### 194 *Temporal stability & kinship*

195 To test for temporal stability in the data, we created subsets of individuals caught in 2017  
196 and 2018. As with the whole dataset, Weir & Cockerham's pairwise  $F_{ST}$  was calculated both  
197 among sampling locations and between the two reassigned clusters, and generated 95%  
198 confidence intervals over 1,000 bootstrapped iterations in hierfstat (Supplementary Table 1).  
199 Modest results that are consistent over time support confidence in a real genetic signal, as  
200 opposed to results driven by bias which are more likely to be inconsistent over time (Waples  
201 1998).

202 To address the possibility that sample collection, extraction, sequencing, or another  
203 process introduced an erroneous year effect into the data, we identified SNPs that differed  
204 between fish sampled in 2017 and 2018 with an  $F_{ST}$  above 0.01 using hierfstat, then filtered out  
205 those SNPs from the data using VCFtools version 0.1.14. Following these steps, 13,640 SNPs  
206 (26.04% of 52,372 neutral SNPs total) were identified as having a large effect between years and  
207 were thus removed, leaving 38,732 SNPs. Analyses for population structure were then re-run  
208 with this smaller set of SNPs.  $F_{ST}$  was calculated both between sites and between two reassigned  
209 clusters described by Adegenet (Supplementary Table 1). Data was also visualized by using a  
210 PCA as implemented in Adegenet version 2.1.1, and t-SNE as implemented in Rtsne version  
211 0.15.

212 To test if our estimates of population structure were not driven by family groups (Waples  
213 1998), we used Colony version 2.0.6.4 to reconstruct pedigrees in our sample of 48 individuals,  
214 with consideration of possible full-siblings (Jones & Wang 2010; Wang 2004). The putatively  
215 neutral SNPs were converted to the Colony format using a script by D. deWaters  
216 (<https://github.com/dandewaters/VCF-File-Converter>). The Colony command-line input file was  
217 then generated to run the program with updated allele frequencies, dioecy, inbreeding possible,  
218 polygamy allowed, no clones, full sibship scaling, no sibship prior, unknown population allele  
219 frequencies, ten runs of medium length, full likelihood inference, and high precision. This  
220 Colony input file was generated using a script originally written by M. Ackerman (used in  
221 Ackerman et al. 2017), modified and posted with permission for the present study. Independent  
222 of Colony's maximum likelihood-based approach, we also used the method of moments as  
223 implemented in SNPRelate version 1.18.0 (Zheng et al. 2012) to estimate a kinship coefficient  
224 between individuals, also using the putatively neutral SNPs.

## 225 *Outlier SNPs*

226           Using the full list of SNPs filtered for genotype quality 30, minor allele frequency > 0.05  
227 and two missing individuals allowed, but not filtered for Hardy-Weinberg Equilibrium or  
228 Linkage Disequilibrium, we tested for outlier SNPs using an unsupervised approach in pcadapt  
229 version 4.1.0 (Luu et al. 2017). The unsupervised approach was used because weak population  
230 differentiation and the likely presence of admixed individuals in the data would either lower our  
231 sample size by filtering admixed individuals out, or lead to false-positive outlier loci by their  
232 inclusion when using a supervised approach with population structure included (Liu et al. 2016).  
233 While this may lead to issues of false positives from multiple tests (Foll & Gaggiotti 2008), we  
234 addressed this issue by using a q-value of 0.05 and focusing our interpretation on transcripts that  
235 contain two or more outlier SNPs. Two PCs were chosen for this analysis by observing the scree  
236 plot visualizing  $K = 1-20$  following Cattell's rule, where the point that a smooth decrease in  
237 eigenvalues levels off on a scree plot is the last important PC for explaining the data (Cattell  
238 1966).

239           By relating the transcript ID of a significant outlier SNP (q-value < 0.05) to that  
240 transcript's putative function and gene ID from the annotated reference transcriptome, a database  
241 of transcripts which diverged by sampling location or year was created for the Lake Winnipeg  
242 walleye in the present study. From this database, a list of transcripts relevant to either sampling  
243 location or year was used for gene set enrichment analysis using EnrichR (Chen et al. 2013;  
244 Kuleshov et al. 2016), thereby summarizing genes by gene ontology (GO) terms. In addition,  
245 transcripts were filtered to find those with two or more significant outlier SNPs that diverged by  
246 either sampling location or year, and these transcripts were few enough that enrichment analysis

247 was not necessary. By only including genes with multiple outlier SNPs, we sought to reduce the  
248 presence of false positive signals in this outlier test.

## 249 **Results**

### 250 *Population structure*

251 Our data suggested weak but significant population structure between the north and south  
252 basins of Lake Winnipeg. The Red River and Matheson Island locations slightly diverged ( $F_{ST} =$   
253 0.0012), while the Dauphin River fish were the most genetically distinct group sampled ( $F_{ST} =$   
254 0.0068 and 0.0043 compared to the Red River and Matheson Island, respectively) (Figures 2, 3,  
255 Table 1, and Supplementary Figure 2). Moreover, Structure and the DAPC returned similar  
256 results with respect to which fish were admixed, although membership probabilities differed  
257 (Figure 2, 3). Between  $K = 2-5$ , Structure consistently separated the Dauphin River fish from the  
258 Matheson Island and Red River fish, while the Red River and Matheson Island fish did not  
259 separate from each other by site, but instead separated between years (Figure 2).

260 The PCA and t-SNE used with the putatively neutral SNPs show similar patterns of  
261 Matheson and Red River fish separated, but more similar to each other than either with the  
262 Dauphin River fish (Supplementary Figure 2). When comparing the PCA and t-SNE plots  
263 between the neutral linkage disequilibrium-pruned SNPs and the broader collection of SNPs used  
264 for outlier analyses, genetic differentiation between the Red River and Matheson Island fish  
265 disappears when using all of the SNPs with the t-SNE, whereas separation between the two sites  
266 persists when only using Hardy-Weinberg Equilibrium filtered and LD-pruned SNPs.

### 267 *Population assignment*

268           Using two clusters for reassignment from Adegenet, out of 48 fish, 36 clustered in one  
269 group (Cluster 1), and twelve in the other (Cluster 2; Supplementary Table 1). Cluster 1 was  
270 characterized by a combined Red River and Matheson Island group of fish with few Dauphin  
271 River fish (six were collected from the Dauphin River, 14 from Matheson Island, and 16 from  
272 the Red River), while Cluster 2 was characterized by Dauphin River fish and a small number of  
273 Matheson Island fish (ten fish from the Dauphin River and two from Matheson Island). Weir and  
274 Cockerham's pairwise  $F_{ST}$  between these two reassigned clusters was 0.0095 with a 95%  
275 confidence interval between 0.0090–0.010.

276           Using three clusters for reassignments from Adegenet, out of 48 fish, 19 were in one  
277 group (Cluster 1), ten fish were in another group (Cluster 2), and 19 fish in a final group (Cluster  
278 3). Clusters 1 and 3 were characterized by a year effect, where every individual in Cluster 1 was  
279 captured in 2018 and every individual in Cluster 3 was captured in 2017. Both Clusters 1 and 3  
280 had 16 out of 19 fish coming from the Red River or Matheson Island sites. Meanwhile, all ten  
281 fish in Cluster 2 were from the Dauphin River with five fish each collected in 2017 and 2018  
282 (Supplementary Table 1).

### 283 *Temporal stability and kinship*

284           When partitioning individuals by sampling location and year collected, all confidence  
285 intervals for between-site pairwise  $F_{ST}$  estimates overlapped over both sampling years, indicating  
286 consistent patterns of between-site divergence in 2017 and 2018. However, values between the  
287 Dauphin River and Matheson Island varied the most, with an estimate of 0.0044 (0.0035–0.0052)  
288 in 2017, and 0.0060 (0.0051–0.0070) in 2018 (Table 2).

289 Using the 38,732 SNPs filtered for loci, which showed  $F_{ST}$  between years of  $> 0.01$ ,  $F_{ST}$   
290 between the two reassigned clusters found using Adegnet (Supplementary Table 1) was 0.010  
291 (0.0094–0.011). With these same year effect-filtered SNPs, pairwise  $F_{ST}$  between sites did not  
292 significantly differ from values found using the neutral SNPs either overall or in a subset by year  
293 (Supplementary Table 2). The PCA and t-SNE on the SNPs filtered for a year effect showed  
294 patterns of spatial differentiation consistent with other analyses, with the Dauphin River fish  
295 being more separate from the Red River and Matheson Island group of fish (Supplementary  
296 Figure 3).

297 We found no evidence of kinship using either Colony or the method of moments. Over  
298 ten replicate runs in Colony, individuals belonged to separate families with inclusive and  
299 exclusive probabilities of 1.0000 each. Using the method of moments implemented in SNPRelate  
300 (Zheng et al. 2012), the highest kinship coefficient between two individuals was 0.096 (mean  
301  $0.053 \pm 0.019$  s.d.), where a kinship coefficient of approximately 0.5 would indicate full-siblings.

### 302 *Outlier SNPs*

303 There was site-specific differentiation across Principal Component 1 (PC1) in the pcadapt  
304 analysis (Figure 4). In total, 1,177 SNPs were outliers at  $q < 0.05$ , with 386 SNPs contributing to  
305 PC1 where fish separated by site, and 791 SNPs contributing to PC2 where fish separated by  
306 year (Figure 4). For the 386 SNPs associated with PC1 (Figure 4), 120 uniquely annotated  
307 transcripts were available for enrichment analysis using EnrichR. These transcripts corresponded  
308 to GO terms such as purine ribonucleoside triphosphate binding, ATP binding, and adenylyl  
309 ribonucleotide binding, all significant at Benjamini-Hochberg adjusted  $p$ -values  $< 0.05$   
310 (Supplementary Table 3). By filtering for uniquely annotated transcripts with  $\geq 2$  outlier SNPs  
311 associated with PC1, 19 transcripts were identified (Table 3) that varied by sampling location.

312 Six of these genes were associated with ion channels and cell membrane transport, including  
313 claudin-10, ankyrin-3, sodium/hydrogen exchanger 6, sodium/potassium-transporting ATPase  
314 subunit alpha-3, perforin-1, and ATP-binding cassette sub-family A member 12. Additionally,  
315 four genes that varied spatially were associated with the cytoskeleton, such as myosin-9,  
316 beta/gamma crystallin domain-containing protein 1, tubulin beta-4B chain, and interferon-  
317 induced protein 44.

318 Using the 791 SNPs associated with Principal Component 2 (PC2), which varied by year  
319 (Figure 4), 130 uniquely annotated transcripts were available for enrichment analysis; however,  
320 no GO terms were significant at an adjusted  $p$ -value  $< 0.05$ . For transcripts with  $\geq 2$  PC2 outlier  
321 SNPs, 17 uniquely annotated genes were identified of which six were either transposons,  
322 transposable elements, or fragments of transposons (Table 4). Two genes that code for the  
323 proteins serine/threonine-protein phosphatase 6 catalytic subunit and protein BTG3, which  
324 regulate cell division in the G1 to S phase transition were also identified (Table 4).

## 325 **Discussion**

326 We observed weak population structure characterized by groups collected at the Red River and  
327 Matheson Island sampling locations, representing south basin and channel fish, contrasted with a  
328 group collected at the Dauphin River, representing north basin fish. As such, the north and south  
329 basin walleye in Lake Winnipeg may be separate groups with an  $F_{ST}$  of 0.0095, but with gene  
330 flow between them primarily at the channel connecting the two basins. Consistent with results in  
331 the present study, a study using microsatellites found a similar weak, but significant,  
332 differentiation between Lake Winnipeg walleye from sites in the north and south basins (e.g.,  $F_{ST}$   
333 = 0.022 between the Grand Rapids in the north and Red River in the south; see Backhouse-James  
334 & Docker 2012), suggesting genomic divergence between walleye from the two basins. One

335 important factor that may have contributed to weak population structure are historical stocking  
336 programs, which may have introduced walleye from nearby Lake Manitoba to Lake Winnipeg  
337 (Backhouse-James & Docker 2012). This unknown amount of gene flow from other systems,  
338 including up to 26.5 million fish annually between 1970 and 1983 (Lysack 1986), may have  
339 masked signatures of spatial population differentiation in Lake Winnipeg.

#### 340 *Temporal differentiation*

341           Differentiation between years was strongest in the south basin, where the Red River and  
342 Matheson Island fish separated by year to a greater extent than the Dauphin River walleye. Three  
343 hypotheses may explain these patterns of stronger temporal differentiation in the south basin.  
344 First, a cohort effect may underlie this pattern, where different year classes were more strongly  
345 represented in the lake during a given sampling year. A cohort effect could be the result of  
346 greater fishing pressure in the south basin than the north basin, as indicated by smaller allowed  
347 net mesh sizes in the south basin (Manitoba Sustainable Development 2019). Fishing pressure  
348 can change population dynamics and age structure in exploited species (Anderson et al. 2008;  
349 Murphy et al. 2001), therefore large fisheries operating since at least 1890 may have affected age  
350 structure in Lake Winnipeg fish (Department of Fisheries 1891). Cohort effects may alternatively  
351 be influenced by environmental conditions including predation intensity, water temperature, and  
352 time to hatch as observed in Lake Erie, Oneida Lake, and Lake Huron walleye (Busch et al.  
353 1975; Fielder et al. 2007; Forney 1976). A second hypothesis is that some Lake Winnipeg  
354 walleye may engage in unobserved skipped spawning or alternate year spawning, which have  
355 been unexpectedly found in several species and may be present in walleye (Carlander et al. 1960;  
356 Henderson et al. 1996; Moles et al. 2008; Rideout & Tomkiewicz 2011). Third, the observed  
357 year effect may be an artifact of error introduced during sampling, extraction, sequencing, or



358 bioinformatics. While some error contributing to between-year differentiation is impossible to  
359 rule out, the possibility that a particular analysis or filtering method introduced the year effect is  
360 reasonably small given that distinct tests showed consistent year effects. Moreover, the data  
361 reveal a consistency in spatial patterns with and without the year effect, demonstrating that at  
362 least the spatial population differentiation in Lake Winnipeg walleye is likely real.

363         While pairwise site  $F_{ST}$  values were temporally consistent (i.e., no significant differences  
364 between years), the greatest pairwise  $F_{ST}$  confidence interval difference between years was  
365 between walleye collected at Matheson Island and the Dauphin River, where confidence  
366 intervals for  $F_{ST}$  estimates overlapped by only 0.0001 between 2017 and 2018. Following  
367 Amrhein et al. (2019), we interpret here the possibility that the entire range of these confidence  
368 intervals reflect meaningful patterns in the data, and that  $F_{ST}$  between the Dauphin River and  
369 Matheson Island was different between 2017 and 2018. Because Matheson Island represents a  
370 narrow channel connecting the north and south basins of Lake Winnipeg, fish which would  
371 normally spawn in the Dauphin River may have used the channel more often in 2017, thus,  
372 lowering  $F_{ST}$  when performing a site-wise comparison. This difference in habitat use may have  
373 arisen from an undetermined environmental variable, such as time of ice melt, which in the north  
374 basin was ten days later in 2018 than in 2017 (D. Watkinson, unpublished data found using  
375 <https://zoom.earth/>).

376         Notably, gene flow appears to be one way from the southern Red River, northward.  
377 Going by capture location, no fish caught in the Red River showed a genetic background  
378 consistent with the Dauphin River fish, while with the Adegnet-reassigned clusters, no fish  
379 assigned to the mostly Dauphin River group was found in the Red River. On the other hand, fish

380 which showed a genetic background consistent with the Red River group were found in the  
381 Dauphin River, both based on capture location and population reassignment.

382 *Biological significance*

383         Several studies report morphological and life history differences between basins in Lake  
384 Winnipeg walleye consistent with the two delineated groups found in this study. Furthermore,  
385 environmental data show a north-south basin distinction with temperature, turbidity, mean depth,  
386 suspended solid, sulphate, sodium, chloride, and nutrient differences between the two basins  
387 (Brunskill et al. 1980; Environment Canada 2011). Walleye in the south basin show a bimodal  
388 growth pattern, where fisheries-induced selection may have contributed to the observation of  
389 dwarf walleye (Johnston et al. 2012; Mole et al. 2010; Sheppard et al. 2018). Harvest-induced  
390 genetic changes have been linked to size reductions in other walleye within two generations  
391 (Bowles et al. 2019). If walleye were panmictic throughout Lake Winnipeg, we might expect the  
392 dwarf morphotype to occur with similar frequency in the north basin. However, out of 616 total  
393 walleye caught in 2010 and 2011 (178 in the north basin, 438 in the south basin), only two out of  
394 32 dwarf fish were caught in the north basin (Sheppard et al. 2018). Diet has also been shown to  
395 differ between north and south basin walleye, possibly because of prey or turbidity differences  
396 between the two basins (i.e., higher turbidity in the south basin) (Brunskill et al. 1980; Sheppard  
397 et al. 2015). Between 1979 and 2003, population characteristics such as age and length at 50%  
398 maturity were higher, while growth rate was slower in the north basin walleye, suggesting some  
399 level of isolation among walleye between basins (Johnston et al. 2012). These population  
400 characteristics may no longer be higher in the north basin following the collapse of the rainbow  
401 smelt (*Osmerus mordax*), after which walleye body condition has decreased since 2010  
402 (Manitoba Government 2018). Scale morphometry further suggests differences among spawning

403 aggregations of walleye, especially between the north and south basins (Kritzer & Sale 2004;  
404 Watkinson & Gillis 2005). Taken together, the results of our study and those of previous studies  
405 suggest weak population structure among Lake Winnipeg walleye, with differentiation between  
406 walleye in the north and south basins. This pattern of weak population structure, high  
407 connectivity, but biologically significant differentiation is common in marine fishes such as the  
408 Atlantic cod (*Gadus morhua*) or Atlantic salmon (*Salmo salar*) (Aykanat et al. 2015; Knutsen et  
409 al. 2011), and of other walleye such as those observed in Lake Erie (Chen et al. 2019; Stepien et  
410 al. 2018).

411         The results of the present study suggest that the genetic differences between Lake  
412 Winnipeg walleye populations may have functional consequences. Out of 19 transcripts that had  
413 multiple SNPs that varied by sampling location, eight were related to membrane function,  
414 particularly ion channel activity. One of these proteins, Claudin-10 mRNA expression levels  
415 have been related ammonia exposure (Connon et al. 2011), rearing density (Sveen et al. 2016),  
416 and salinity (Bossus et al. 2015; Kolosov et al. 2013; Marshall et al. 2018) in fishes. Spatial  
417 variation in cell membrane proteins is consistent with environmental differences between basins  
418 in chemicals such as sodium, chloride, and phosphorous (Environment Canada 2011), although  
419 the biological impacts of these spatial chemical differences is unknown. Four cytoskeletal  
420 proteins were represented in the outlier SNPs that vary by sampling location as well.  
421 Cytoskeletal function is connected to cell growth in plants (Hussey et al. 2006; Wasteneys &  
422 Galway 2003), yeast (Li et al. 1995; Pruyne & Bretscher 2000), mouse cells (Kim et al. 2006;  
423 Kim & Coulombe 2010), and zebrafish (Johnston et al. 2011). Spatial variation in genes related  
424 to cell growth may thus be consistent with growth rate differences observed among walleye in

425 Lake Winnipeg, where north basin fish had higher growth rates in 2010 and 2011 (Sheppard et  
426 al. 2018).

#### 427 *Limitations*

428 Despite its advantages, there are some limitations to using mRNA sequencing in the  
429 context of population genetics. The depth of sequencing required for differential gene expression  
430 and differential exon usage leads to greater costs associated with mRNA sequencing studies  
431 relative to reduced representation methods such as RAD-seq (Davey & Blaxter 2011). This often  
432 translates to a lower sample size, as is the case in our study. Reduced sample sizes can bias  
433 aspects of population genetic analyses, including identifying population structure (Waples &  
434 Gaggiotti 2006) and outlier SNPs (Luu et al. 2016). Second, mutations in mRNA are widely  
435 under selection (Chamary & Hurst 2005), therefore, caution must be exercised when interpreting  
436 SNPs from mRNA in genetic tests assuming neutrality. Third, linkage disequilibrium is useful  
437 for analyses of selective sweeps and demographic history (Catchen et al. 2017; Garrigan &  
438 Hammer 2006; Hoffmann & Willi 2008), among other approaches, but mRNA data may not be  
439 appropriate for these analyses because the extent of linkage between transcripts and marker  
440 density across the genome may be unknown. Finally, one key element of how transcriptomics  
441 was used in the present study is that it measured expressed mRNA in gill tissue. Messenger RNA  
442 expression provides useful information for transcript quantification-based analyses, but likely  
443 biases SNP discovery toward more highly expressed transcripts in the tissue collected. It is  
444 unknown how this expression-specific bias may influence population genomics. Nevertheless,  
445 mRNA sequencing has proven useful for recapitulating population structure discovered with  
446 traditional genetic methods (Jeffries et al. 2019) and describing previously uncharacterized  
447 population structure (Ellison et al. 2011; Yan et al. 2017).

448 *Conservation applications*

449           We used population genetics and outlier detection to characterize weak, but biologically  
450 significant population structure, possible one-way gene flow, and genetic variation possibly  
451 underlying biological differences among Lake Winnipeg walleye. These results are consistent  
452 with observations of behavioural differences leading to fine-scale divergence in the walleye of  
453 other systems (Stepien et al. 2009). The low levels of population differentiation and possible  
454 gene flow from the south basin northward, indicate that this system may be effectively managed  
455 as a demographically connected metapopulation with two contributing populations (Kritzer &  
456 Sale 2004), consistent with conclusions from scale morphology presented in Watkinson & Gillis  
457 (2005) and with observations of subtle stock structure in Lake Erie walleye (Chen et al. 2019;  
458 Stepien et al. 2018).

459           The results from this study provide valuable information for walleye management,  
460 especially because the status of Lake Winnipeg walleye is becoming a concern and conservation  
461 action may be necessary to sustain the fishery. Signs of a declining fishery include a decrease in  
462 biomass and body condition between 2010 and 2015 (Manitoba Government 2018), possible  
463 unnatural selection against larger, economically desirable fish (Allendorf & Hard 2009; Bowles  
464 et al. 2019; Moles et al. 2010), models showing walleye harvests have been above maximum  
465 sustainable yields since the early 2000s, and a trend in harvest decline since 2010 (Manitoba  
466 Sustainable Development 2017–2018). The data gathered here, particularly the spatial variation  
467 in genes that may drive functional differences among Lake Winnipeg walleye, is useful for  
468 generating hypotheses that test and explain organismal responses to environmental stressors,  
469 thereby providing additional information for resource managers. For instance, life-history trait  
470 differences can inform conservation in threatened fishes by identifying resilient populations in a

471 system (Hamidan & Britton 2015). Therefore, possible functional variation identified in this  
472 study may underlie heritable genetic differences among Lake Winnipeg walleye that change  
473 important traits such as tolerance to environmental conditions and growth rate differences. This  
474 information may be useful for integrating demographic connectivity and functional differences  
475 among walleye into a cohesive management framework.

476         We have shown how RNA sequencing data can be used for a population genomic scan in  
477 a non-model fish, even in a system where little molecular information is available. Filtering for  
478 Hardy-Weinberg equilibrium and linkage disequilibrium allows investigators to draw neutral  
479 markers from mRNA sequence data, making it useful for classical population genetic  
480 approaches. By contrast, the wide selective effects present in species' transcriptomes allow for  
481 hypothesis-generating outlier tests that may reveal variation underlying phenotypic differences  
482 among populations. Non-lethal sampling makes RNA sequencing useful for species with low  
483 population sizes and for follow-up studies, such as the potential to track tagged individuals from  
484 which tissue has been collected. Because RNA sequencing data can yield physiological in  
485 addition to genetic information discussed here, we argue that it is useful for addressing diverse  
486 molecular questions in the conservation of freshwater species.

487

488

489

490

491

492 Acknowledgements

493 We thank D. Watkinson, C. Charles, C. Kovachik, D. Leroux, N. Turner, M. Gaudry, S.  
494 Glowa, and E. Barker for helping to sample these fish in the field. D. Watkinson and C. Charles  
495 also assisted with ice on/ice off data and a map of Lake Winnipeg, respectively. Dr. C. Garroway  
496 provided valuable suggestions in data analysis, and Dr. G. Anderson engaged in useful  
497 conversations about Lake Winnipeg ecology. We thank the Lake Winnipeg Research Consortium  
498 Inc. for supporting the open access publication of this manuscript. Many analyses were enabled  
499 by our chance to use computing resources provided by WestGrid ([www.westgrid.ca](http://www.westgrid.ca)) and  
500 Compute Canada ([www.computecanada.ca](http://www.computecanada.ca)). Sequencing was performed at the McGill  
501 University and Génome Québec Innovation Centre sequencing facility. This work was supported  
502 by a Fisheries and Oceans Canada Ocean and Freshwater Science Contribution Program  
503 Partnership Fund grant awarded to J.R.T., K.M.J. and Darren Gillis, and Natural Sciences and  
504 Engineering Research Council of Canada Discovery Grants awarded to K.M.J. (#05479) and  
505 J.R.T. (#06052). Work by J.R.T. is also supported by the Canada Research Chairs program  
506 (#223744) and the Faculty of Science, University of Manitoba (#319254).

507

508

509 Data Archiving Statement

510 Raw sequence reads are available through the National Center for Biotechnology Information  
511 Sequence Read Archive (accession #PRJNA596986,  
512 <https://www.ncbi.nlm.nih.gov/sra/PRJNA596986>).

513

514 Works Cited

- 515 Ackerman, M. W., Hand, B. K., Waples, R. K., Luikart, G., Waples, R. S., Steele, C. A., Garner,  
516 B.A., McCane, J., Campbell, M. R. (2017). Effective number of breeders from sibship  
517 reconstruction: empirical evaluations using hatchery steelhead. *Evolutionary*  
518 *Applications*, 10(2), 146–160. <https://doi.org/10.1111/eva.12433>
- 519 Amrhein, V., Greenland, S., & McShane, B. (2019). Scientists rise up against statistical  
520 significance. *Nature*, 567(7748), 305–307. <https://doi.org/10.1038/d41586-019-00857-9>
- 521 Anderson, C. N. K., Hsieh, C. H., Sandin, S. A., Hewitt, R., Hollowed, A., Beddington, J., May,  
522 R., Sugihara, G. (2008). Why fishing magnifies fluctuations in fish abundance. *Nature*,  
523 452(7189), 835–839. <https://doi.org/10.1038/nature06851>
- 524 Andrews, S. (2010). *FastQC: a quality control tool for high throughput sequence data*.  
525 <https://www.bioinformatics.babraham.ac.uk/projects/fastqc/>
- 526 Aykanat, T., Johnston, S. E., Orell, P., Niemelä, E., Erkinaro, J., & Primmer, C. R. (2015). Low  
527 but significant genetic differentiation underlies biologically meaningful phenotypic  
528 divergence in a large Atlantic salmon population. *Molecular Ecology*, 24(20), 5158–5174.  
529 <https://doi.org/10.1111/mec.13383>
- 530 Backhouse-James, S. M., & Docker, M. F. (2012). Microsatellite and mitochondrial DNA  
531 markers show no evidence of population structure in walleye (*Sander vitreus*) in Lake  
532 Winnipeg. *Journal of Great Lakes Research*, 38, 47–57.  
533 <https://doi.org/10.1016/j.jglr.2011.05.005>
- 534 Bolger, A. M., Lohse, M., & Usadel, B. (2014). Trimmomatic: A flexible trimmer for Illumina  
535 sequence data. *Bioinformatics*, 30(15), 2114–2120.  
536 <https://doi.org/10.1093/bioinformatics/btu170>



- 537 Bowles, E., Marin, K., & Fraser, D. J. (2019). Size reductions and genomic changes associated  
538 with harvesting within two generations in wild walleye populations. *BioRxiv Preprint*,  
539 (September). <https://doi.org/10.1101/787374>
- 540 Braje, T. J., & Erlandson, J. M. (2013). Human acceleration of animal and plant extinctions: A  
541 Late Pleistocene, Holocene, and Anthropocene continuum. *Anthropocene*, 4, 14–23.  
542 <https://doi.org/10.1016/j.ancene.2013.08.003>
- 543 Broad Institute. (2019). Picard Tools. *Broad Institute, GitHub Repository*. Retrieved from  
544 <http://broadinstitute.github.io/picard/>
- 545 Brunskill, G.J., Elliot, S.E.M., & Campbell, P. (1980). Morphometry, hydrology, and watershed  
546 data pertinent to the limnology of Lake Winnipeg. Canadian Manuscript Report of Fisheries  
547 & Aquatic Sciences No. 1556. 1–32.
- 548 Busch, W.-D. N., Scholl, R. L., & Hartman, W. L. (1975). Environmental factors affecting the  
549 strength of walleye (*Stizostedion vitreum vitreum*) year-classes in western Lake Erie, 1960–  
550 70. *Journal of the Fisheries Research Board of Canada*, 32(10), 1733–1743.  
551 <https://doi.org/10.1139/f75-207>
- 552 Carlander, K. D., Whitney, R. R., Speaker, E. B., & Madden, K. (1960). Evaluation of Walleye  
553 Fry Stocking in Clear Lake, Iowa, by Alternate-Year Planting. *Transactions of the*  
554 *American Fisheries Society*, 89(3), 249–254. [https://doi.org/https://doi.org/10.1577/1548-](https://doi.org/https://doi.org/10.1577/1548-8659(1960)89[249:EOWFSI]2.0.CO;2)  
555 [8659\(1960\)89\[249:EOWFSI\]2.0.CO;2](https://doi.org/https://doi.org/10.1577/1548-8659(1960)89[249:EOWFSI]2.0.CO;2)
- 556 Catchen, J. M., Hohenlohe, P. A., Bernatchez, L., Funk, W. C., Andrews, K. R., & Allendorf, F.  
557 W. (2017). Unbroken: RADseq remains a powerful tool for understanding the genetics of  
558 adaptation in natural populations. *Molecular Ecology Resources*, 17(3), 362–365.  
559 <https://doi.org/10.1111/1755-0998.12669>

- 560 Chamary, J., & Hurst, L. D. (2005). Evidence for selection on synonymous mutations affecting  
561 stability of mRNA secondary structure in mammals. *Genome Biology*, 6(9), R75.  
562 <https://doi.org/10.1186/gb-2005-6-9-r75>
- 563 Chen, K. Y., Euclide, P. T., Ludsin, S. A., Larson, W., Sovic, M. G., Gibbs, H. L., & Marschall,  
564 E. A. (2019). RAD-seq refines previous estimates of genetic structure in Lake Erie walleye  
565 (*Sander vitreus*). *Transactions of the American Fisheries Society*.  
566 <https://doi.org/10.1002/tafs.10215>
- 567 Chen, E. Y., Tan, C. M., Kou, Y., Duan, Q., Wang, Z., Meirelles, G., ... Ma'ayan, A. (2013).  
568 Enrichr: Interactive and collaborative HTML5 gene list enrichment analysis tool. *BMC*  
569 *Bioinformatics*, 14(1), 128. <https://doi.org/10.1186/1471-2105-14-128>
- 570 Cingolani, P., Platts, A., Wang, L. L., Coon, M., Nguyen, T., Wang, L., ... Ruden, D. M. (2012).  
571 A program for annotating and predicting the effects of single nucleotide polymorphisms,  
572 SnpEff. *Fly*, 6(2), 80–92. <https://doi.org/10.4161/fly.19695>
- 573 Cannon, R. E., Jeffries, K. M., Komoroske, L. M., Todgham, A. E., & Fanguie, N. A. (2018). The  
574 utility of transcriptomics in fish conservation. *The Journal of Experimental Biology*, 221(2),  
575 jeb148833. <https://doi.org/10.1242/jeb.148833>
- 576 Danecek, P., Auton, A., Abecasis, G., Albers, C. A., Banks, E., DePristo, M. A., ... 1000  
577 Genomes Project Analysis Group. (2011). The variant call format and VCFtools.  
578 *Bioinformatics*, 27(15), 2156–2158. <https://doi.org/10.1093/bioinformatics/btr330>
- 579 Davey, J. W., & Blaxter, M. L. (2010). RADSeq: Next-generation population genetics. *Briefings*  
580 *in Functional Genomics*, 9(5–6), 416–423. <https://doi.org/10.1093/bfgp/elq031>

- 581 Davidson, N. M., Hawkins, A. D. K., & Oshlack, A. (2017). SuperTranscripts: A data driven  
582 reference for analysis and visualisation of transcriptomes. *Genome Biology*, *18*(1), 148.  
583 <https://doi.org/10.1186/s13059-017-1284-1>
- 584 Davidson, N. M., & Oshlack, A. (2014). Corset: Enabling differential gene expression analysis  
585 for de novo assembled transcriptomes. *Genome Biology*, *15*(7), 410.  
586 <https://doi.org/10.1186/s13059-014-0410-6>
- 587 Department of Fisheries. (1891). *Report of the Department of Fisheries for the Year 1890*.  
588 Ottawa. Retrieved from [https://waves-vagues.dfo-](https://waves-vagues.dfo-mpo.gc.ca/Library/40758606_1890_pt.1.pdf)  
589 [mpo.gc.ca/Library/40758606\\_1890\\_pt.1.pdf](https://waves-vagues.dfo-mpo.gc.ca/Library/40758606_1890_pt.1.pdf).
- 590 Dirzo, R., Young, H. S., Galetti, M., Ceballos, G., Isaac, N. J. B., & Collen, B. (2014).  
591 Defaunation in the Anthropocene. *Science*, *345*(6195), 401–406.  
592 <https://doi.org/10.1126/science.1251817>
- 593 Dobin, A., Davis, C. A., Schlesinger, F., Drenkow, J., Zaleski, C., Jha, S., Batut, P., Chaisson,  
594 M., Gingeras, T. R. (2013). STAR: Ultrafast universal RNA-seq aligner. *Bioinformatics*,  
595 *29*(1), 15–21. <https://doi.org/10.1093/bioinformatics/bts635>
- 596 Ellison, C. E., Hall, C., Kowbel, D., Welch, J., Brem, R. B., Glass, N. L., & Taylor, J. W. (2011).  
597 Population genomics and local adaptation in wild isolates of a model microbial eukaryote.  
598 *Proceedings of the National Academy of Sciences*, *108*(7), 2831–2836.  
599 <https://doi.org/10.1073/pnas.1014971108>
- 600 Falush, D., Stephens, M., & Pritchard, J. K. (2007). Inference of population structure using  
601 multilocus genotype data: Dominant markers and null alleles: *Molecular Ecology Notes*,  
602 *7*(4), 574–578. <https://doi.org/10.1111/j.1471-8286.2007.01758.x>

- 603 Falush, D., Stephens, M., & Pritchard, J. K. (2003). Inference of Population Structure Using  
604 Multilocus Genotype Data: Linked Loci and Correlated Allele Frequencies. *Genetics*,  
605 164(4), 1567 LP – 1587. Retrieved from  
606 <http://www.genetics.org/content/164/4/1567.abstract>
- 607 Fielder, D. G., Schaeffer, J. S., & Thomas, M. V. (2007). Environmental and ecological  
608 conditions surrounding the production of large year classes of walleye (*Sander vitreus*) in  
609 Saginaw Bay, Lake Huron. *Journal of Great Lakes Research*, 33(SUPPL. 1), 118–132.  
610 [https://doi.org/10.3394/0380-1330\(2007\)33\[118:EAECST\]2.0.CO;2](https://doi.org/10.3394/0380-1330(2007)33[118:EAECST]2.0.CO;2)
- 611 Foll, M., & Gaggiotti, O. (2008). A genome-scan method to identify selected loci appropriate for  
612 both dominant and codominant markers: A Bayesian perspective. *Genetics*, 180(2), 977–  
613 993. <https://doi.org/10.1534/genetics.108.092221>
- 614 Forney, J. L. (1976). Year-class formation in the walleye (*Stizostedion vitreum vitreum*)  
615 population of Oneida Lake, New York, 1966–73. *Journal of the Fisheries Research Board*  
616 *of Canada*, 33(4), 783–792. <https://doi.org/10.1139/f76-096>
- 617 Funk, W. C., McKay, J. K., Hohenlohe, P. A., & Allendorf, F. W. (2012). Harnessing genomics  
618 for delineating conservation units. *Trends in Ecology & Evolution*, 27(9), 489–496.  
619 <https://doi.org/10.1016/j.tree.2012.05.012>
- 620 Garrigan, D., & Hammer, M. F. (2006). Reconstructing human origins in the genomic era.  
621 *Nature Reviews Genetics*, 7(9), 669–680. <https://doi.org/10.1038/nrg1941>
- 622 Garrison, E., & Marth, G. (2012). Haplotype-based variant detection from short-read sequencing.  
623 *ArXiv:1207.3907 [q-Bio]*. Retrieved from <http://arxiv.org/abs/1207.3907>

- 624 Grabherr, M. G., Haas, B. J., Yassour, M., Levin, J. Z., Thompson, D. A., Amit, I., ... Regev, A.  
625 (2011). Full-length transcriptome assembly from RNA-Seq data without a reference  
626 genome. *Nature Biotechnology*, 29(7), 644–652. <https://doi.org/10.1038/nbt.1883>
- 627 Hamidan, N., & Britton, J. R. (2015). Age and growth rates of the critically endangered fish  
628 *Garra ghorensis* can inform their conservation management. *Aquatic Conservation: Marine*  
629 *and Freshwater Ecosystems*, 25(1), 61-70.
- 630 Healy, T. M., & Schulte, P. M. (2019). Patterns of alternative splicing in response to cold  
631 acclimation in fish. *The Journal of Experimental Biology*, 222(5), jeb193516.  
632 <https://doi.org/10.1242/jeb.193516>
- 633 Henderson, B. A., Wong, J. L., & Nepszy, S. J. (1996). Reproduction of walleye in Lake Erie:  
634 Allocation of energy. *Canadian Journal of Fisheries and Aquatic Sciences*, 53(1), 127–133.  
635 <https://doi.org/10.1139/f95-162>
- 636 Hoffmann, A. A., & Willi, Y. (2008). Detecting genetic responses to environmental change.  
637 *Nature Reviews Genetics*, 9(6), 421–432. <https://doi.org/10.1038/nrg2339>
- 638 Hubisz, M. J., Falush, D., Stephens, M., & Pritchard, J. K. (2009). Inferring weak population  
639 structure with the assistance of sample group information. *Molecular Ecology Resources*,  
640 9(5), 1322–1332. <https://doi.org/10.1111/j.1755-0998.2009.02591.x>
- 641 Hussey, P. J., Ketelaar, T., & Deeks, M. J. (2006). Control of the actin cytoskeleton in plant cell  
642 growth. *Annual Review of Plant Biology*, 57(1), 109–125.  
643 <https://doi.org/10.1146/annurev.arplant.57.032905.105206>
- 644 Jeffries, K. M., Connon, R. E., Verhille, C. E., Dabruzzi, T. F., Britton, M. T., Durbin-Johnson,  
645 B. P., & Fanguie, N. A. (2019). Divergent transcriptomic signatures in response to salinity

- 646 exposure in two populations of an estuarine fish. *Evolutionary Applications*, eua.12799.
- 647 <https://doi.org/10.1111/eva.12799>
- 648 Johnston, I. A., Bower, N. I., & Macqueen, D. J. (2011). Growth and the regulation of myotomal  
649 muscle mass in teleost fish. *Journal of Experimental Biology*, 214(10), 1617-1628.
- 650 Johnston, T. A., Lysack, W., & Leggett, W. C. (2012). Abundance, growth, and life history  
651 characteristics of sympatric walleye (*Sander vitreus*) and sauger (*Sander canadensis*) in  
652 Lake Winnipeg, Manitoba. *Journal of Great Lakes Research*, 38, 35–46.
- 653 <https://doi.org/10.1016/j.jglr.2010.06.009>
- 654 Jombart, T., Devillard, S., & Balloux, F. (2010). Discriminant analysis of principal components:  
655 A new method for the analysis of genetically structured populations. *BMC Genetics*, 11(1),  
656 94. <https://doi.org/10.1186/1471-2156-11-94>
- 657 Jones, O. R., & Wang, J. (2010). COLONY: a program for parentage and sibship inference from  
658 multilocus genotype data. *Molecular Ecology Resources*, 10(3), 551–555.
- 659 <https://doi.org/10.1111/j.1755-0998.2009.02787.x>
- 660 Kim, S., & Coulombe, P. A. (2010). Emerging role for the cytoskeleton as an organizer and  
661 regulator of translation. *Nature Reviews Molecular Cell Biology*, 11(1), 75–81.
- 662 <https://doi.org/10.1038/nrm2818>
- 663 Kim, S., Wong, P., & Coulombe, P. A. (2006). A keratin cytoskeletal protein regulates protein  
664 synthesis and epithelial cell growth. *Nature*, 441(7091), 362–365.
- 665 <https://doi.org/10.1038/nature04659>
- 666 Knaus, B. J., & Grünwald, N. J. (2017). VCFR: a package to manipulate and visualize variant  
667 call format data in R. *Molecular Ecology Resources*, 17(1), 44–53.
- 668 <https://doi.org/10.1111/1755-0998.12549>

- 669 Knutsen, H., Olsen, E. M., Jorde, P. E., Espeland, S. H., André, C., & Stenseth, N. C. (2011).  
670 Are low but statistically significant levels of genetic differentiation in marine fishes  
671 ‘biologically meaningful’? A case study of coastal Atlantic cod: Biologically relevant  
672 genetic signals. *Molecular Ecology*, 20(4), 768–783. [https://doi.org/10.1111/j.1365-](https://doi.org/10.1111/j.1365-294X.2010.04979.x)  
673 [294X.2010.04979.x](https://doi.org/10.1111/j.1365-294X.2010.04979.x)
- 674 Kolosov, D., Bui, P., Chasiotis, H., & Kelly, S. P. (2013). Claudins in teleost fishes. *Tissue*  
675 *Barriers*, 1(3), e25391. <https://doi.org/10.4161/tisb.25391>
- 676 Kritzer, J. P., & Sale, P. F. (2004). Metapopulation ecology in the sea: From Levins’ model to  
677 marine ecology and fisheries science. *Fish and Fisheries*, 5(2), 131–140.  
678 <https://doi.org/10.1111/j.1467-2979.2004.00131.x>
- 679 Kuleshov, M. V., Jones, M. R., Rouillard, A. D., Fernandez, N. F., Duan, Q., Wang, Z., ...  
680 Ma’ayan, A. (2016). Enrichr: A comprehensive gene set enrichment analysis web server  
681 2016 update. *Nucleic Acids Research*, 44(W1), W90–W97.  
682 <https://doi.org/10.1093/nar/gkw377>
- 683 Lake Winnipeg Basin Indicator Series: Fish Populations. (2018). *Manitoba Government*, 6.
- 684 Lawson, D. J., van Dorp, L., & Falush, D. (2018). A tutorial on how not to over-interpret  
685 STRUCTURE and ADMIXTURE bar plots. *Nature Communications*, 9(1), 3258.  
686 <https://doi.org/10.1038/s41467-018-05257-7>
- 687 Li, H., Handsaker, B., Wysoker, A., Fennell, T., Ruan, J., Homer, N., ... 1000 Genome Project  
688 Data Processing Subgroup. (2009). The sequence alignment/map format and SAMtools.  
689 *Bioinformatics*, 25(16), 2078–2079. <https://doi.org/10.1093/bioinformatics/btp352>

- 690 Li, R. (1995). Regulation of cortical actin cytoskeleton assembly during polarized cell growth in  
691 budding yeast. *The Journal of Cell Biology*, 128(4), 599–615.  
692 <https://doi.org/10.1083/jcb.128.4.599>
- 693 Liu, L., Ang, K. P., Elliott, J. A. K., Kent, M. P., Lien, S., MacDonald, D., & Boulding, E. G.  
694 (2017). A genome scan for selection signatures comparing farmed Atlantic salmon with two  
695 wild populations: Testing colocalization among outlier markers, candidate genes, and  
696 quantitative trait loci for production traits. *Evolutionary Applications*, 10(3), 276–296.  
697 <https://doi.org/10.1111/eva.12450>
- 698 Luu, K., Bazin, E., & Blum, M. G. B. (2017). pcadapt: An R package to perform genome scans  
699 for selection based on principal component analysis. *Molecular Ecology Resources*, 17(1),  
700 67–77. <https://doi.org/10.1111/1755-0998.12592>
- 701 Manitoba Fishery Regulations, 1987. (1987). SOR/87-509. Retrieved from <https://laws->  
702 [lois.justice.gc.ca/eng/regulations/sor-87-509/index.html](https://laws-justice.gc.ca/eng/regulations/sor-87-509/index.html)
- 703 Manitoba Sustainable Development. (2018). *Manitoba Sustainable Development Annual Report*  
704 *2017-2018*(p. 206). Retrieved from <http://www.gov.mb.ca/finance/publications/annual.html>
- 705 Manitoba Sustainable Development. (2019). Lake Winnipeg Measures to Enhance Sustainability.  
706 Retrieved from  
707 [https://www.gov.mb.ca/sd/pubs/fish\\_wildlife/fish/quota\\_buyback\\_proposed\\_reg.pdf](https://www.gov.mb.ca/sd/pubs/fish_wildlife/fish/quota_buyback_proposed_reg.pdf)
- 708 Marshall, W. S., Breves, J. P., Doohan, E. M., Tipsmark, C. K., Kelly, S. P., Robertson, G. N., &  
709 Schulte, P. M. (2018). Clauding-10 isoform expression and cation selectivity change with  
710 salinity in salt-secreting epithelia of *Fundulus heteroclitus*. *The Journal of Experimental*  
711 *Biology*, 221(1), jeb168906. <https://doi.org/10.1242/jeb.168906>



- 712 Moles, M. D., Johnston, T. A., Robinson, B. W., Leggett, W. C., & Casselman, J. M. (2008). Is  
713 gonadal investment in walleye (*Sander vitreus*) dependent on body lipid reserves? A  
714 multipopulation comparative analysis. *Canadian Journal of Fisheries and Aquatic Sciences*,  
715 65(4), 600–614. <https://doi.org/10.1139/F07-186>
- 716 Moles, M. D., Robinson, B. W., Johnston, T. A., Cunjak, R. A., Jardine, T. D., Casselman, J. M.,  
717 & Leggett, W. C. (2010). Morphological and trophic differentiation of growth morphotypes  
718 of walleye (*Sander vitreus*) from Lake Winnipeg, Canada. *Canadian Journal of Zoology*,  
719 88(10), 950–960. <https://doi.org/10.1139/Z10-062>
- 720 Murphy, M. D., & Crabtree, R. E. (2001). Changes in the age structure of nearshore adult red  
721 drum off west-central Florida related to recruitment and fishing mortality. *North American*  
722 *Journal of Fisheries Management*, 21(3), 671–678. [https://doi.org/10.1577/1548-](https://doi.org/10.1577/1548-8675(2001)021<0671:CITASO>2.0.CO;2)  
723 [8675\(2001\)021<0671:CITASO>2.0.CO;2](https://doi.org/10.1577/1548-8675(2001)021<0671:CITASO>2.0.CO;2)
- 724 Patro, R., Duggal, G., Love, M. I., Irizarry, R. A., & Kingsford, C. (2017). Salmon provides fast  
725 and bias-aware quantification of transcript expression. *Nature Methods*, 14(4), 417–419.  
726 <https://doi.org/10.1038/nmeth.4197>
- 727 Pritchard, J. K., Stephens, M., & Donnelly, P. (2000). Inference of population structure using  
728 multilocus genotype data. *Genetics*, 155(2), 945–959.
- 729 Pruyne, D., & Bretscher, A. (2000). Polarization of cell growth in yeast. *Journal of Cell Science*,  
730 113(4), 571 LP – 585. Retrieved from <http://jcs.biologists.org/content/113/4/571.abstract>
- 731 R Core Team (2019). R: A language and environment for statistical computing. R Foundation for  
732 Statistical Computing, Vienna, Austria. URL <https://www.R-project.org/>.

- 733 Reid, A. J., Carlson, A. K., Creed, I. F., Eliason, E. J., Gell, P. A., Johnson, P. T. J., ... Cooke, S.  
734 J. (2019). Emerging threats and persistent conservation challenges for freshwater  
735 biodiversity. *Biological Reviews*, 94(3), 849–873. <https://doi.org/10.1111/brv.12480>
- 736 Rideout, R. M., & Tomkiewicz, J. (2011). Skipped spawning in fishes: More common than you  
737 might think. *Marine and Coastal Fisheries*, 3(1), 176–189.  
738 <https://doi.org/10.1080/19425120.2011.556943>
- 739 Russello, M. A., Kirk, S. L., Frazer, K. K., & Askey, P. J. (2011). Detection of outlier loci and  
740 their utility for fisheries management: Outlier loci for fisheries management. *Evolutionary*  
741 *Applications*, 5(1), 39–52. <https://doi.org/10.1111/j.1752-4571.2011.00206.x>
- 742 Sheppard, Katie T., Davoren, G. K., & Hann, B. J. (2015). Diet of walleye and sauger and  
743 morphological characteristics of their prey in Lake Winnipeg. *Journal of Great Lakes*  
744 *Research*, 41(3), 907–915. <https://doi.org/10.1016/j.jglr.2015.05.006>
- 745 Sheppard, K.T., Hann, B. J., & Davoren, G. K. (2018). Growth rate and condition of walleye  
746 (*Sander vitreus*), sauger (*Sander canadensis*), and dwarf walleye in a large Canadian lake.  
747 *Canadian Journal of Zoology*, 96(7), 739–747. <https://doi.org/10.1139/cjz-2017-0276>
- 748 State of Lake Winnipeg: 1999 to 2007. (2011). *Environment Canada*. Retrieved from  
749 <http://publications.gc.ca/pub?id=9.652328&sl=0>
- 750 Stepien, C. A., Murphy, D. J., Lohner, R. N., Sepulveda-Villet, O. J., & Haponski, A. E. (2009).  
751 Signatures of vicariance, postglacial dispersal and spawning philopatry: population genetics  
752 of the walleye *Sander vitreus*. *Molecular Ecology*, 18(16), 3411-3428.
- 753 Stepien, C. A., Snyder, M. R., & Knight, C. T. (2018). Genetic divergence of nearby walleye  
754 spawning groups in central Lake Erie: implications for management. *North American*  
755 *Journal of Fisheries Management*, 38(4), 783-793.

- 756 Sveen, L. R., Timmerhaus, G., Torgersen, J. S., Ytteborg, E., Jørgensen, S. M., Handeland, S., ...  
757 Takle, H. (2016). Impact of fish density and specific water flow on skin properties in  
758 Atlantic salmon (*Salmo salar* L.) post-smolts. *Aquaculture*, 464, 629–637.  
759 <https://doi.org/10.1016/j.aquaculture.2016.08.012>
- 760 Vähä, J.-P., Erkinaro, J., Niemelä, E., & Primmer, C. R. (2007). Life-history and habitat features  
761 influence the within-river genetic structure of Atlantic salmon. *Molecular Ecology*, 16(13),  
762 2638–2654. <https://doi.org/10.1111/j.1365-294X.2007.03329.x>
- 763 Van Der Maaten, L. J. P., & Hinton, G. E. (2008). Visualizing high-dimensional data using t-sne.  
764 *Journal of Machine Learning Research*, 9, 2579–2605. [https://doi.org/10.1007/s10479-011-](https://doi.org/10.1007/s10479-011-0841-3)  
765 0841-3
- 766 Verta, J.-P., & Jones, F. C. (2019). Predominance of cis-regulatory changes in parallel  
767 expression divergence of sticklebacks. *ELife*, 8, e43785.  
768 <https://doi.org/10.7554/eLife.43785.001>
- 769 Wang, J. (2004). Sibship Reconstruction From Genetic Data With Typing Errors. *Genetics*,  
770 166(4), 1963–1979. <https://doi.org/10.1534/genetics.166.4.1963>
- 771 Waples, R. S. (1998). Separating the wheat from the chaff: Patterns of genetic differentiation in  
772 high gene flow species. *Journal of Heredity*, 89(5), 438–450.  
773 <https://doi.org/10.1093/jhered/89.5.438>
- 774 Waples, Robin S., & Gaggiotti, O. (2006). What is a population? An empirical evaluation of  
775 some genetic methods for identifying the number of gene pools and their degree of  
776 connectivity: What is a population? *Molecular Ecology*, 15(6), 1419–1439.  
777 <https://doi.org/10.1111/j.1365-294X.2006.02890.x>

- 778 Wasteneys, G. O., & Galway, M. E. (2003). Remodeling the cytoskeleton for growth and form:  
779 An overview with some new views. *Annual Review of Plant Biology*, 54(1), 691–722.  
780 <https://doi.org/10.1146/annurev.arplant.54.031902.134818>
- 781 Watkinson, D. A., & Gillis, D. M. (2005). Stock discrimination of Lake Winnipeg walleye based  
782 on Fourier and wavelet description of scale outline signals. *Fisheries Research*, 72(2–3),  
783 193–203. <https://doi.org/10.1016/j.fishres.2004.11.002>
- 784 Weir, B. S., & Cockerham, C. C. (1984). Estimating  $F$  -statistics for the analysis of population  
785 structure. *Evolution*, 38(6), 1358–1370. <https://doi.org/10.1111/j.1558-5646.1984.tb05657.x>
- 786 Whitlock, M. C., & Lotterhos, K. E. (2015). Reliable detection of loci responsible for local  
787 adaptation: Inference of a null model through trimming the distribution of  $F_{ST}$ . *The*  
788 *American Naturalist*, 186(S1), S24–S36. <https://doi.org/10.1086/682949>
- 789 WWF (2016). Living Planet Report 2016: Risk and resilience in a new era. WWF  
790 International, Gland, Switzerland. Retrieved from  
791 [http://awsassets.panda.org/downloads/lpr\\_living\\_planet\\_report\\_2016.pdf](http://awsassets.panda.org/downloads/lpr_living_planet_report_2016.pdf)
- 792 WWF (2018). Living Planet Report 2018: Aiming higher (Eds M. Grooten and R. E. A.  
793 Almond). WWF International, Gland, Switzerland. Retrieved from  
794 [http://assets.wwf.ca/downloads/lpr2018\\_full\\_report\\_spreads.pdf](http://assets.wwf.ca/downloads/lpr2018_full_report_spreads.pdf)
- 795 Yan, J., Song, Z., Xu, Q., Kang, L., Zhu, C., Xing, S., ... Sang, T. (2017). Population  
796 transcriptomic characterization of the genetic and expression variation of a candidate  
797 progenitor of *Miscanthus* energy crops. *Molecular Ecology*, 26(21), 5911–5922.  
798 <https://doi.org/10.1111/mec.14338>
- 799 Yang, R.-C. (1998). Estimating hierarchical  $F$  -statistics. *Evolution*, 52(4), 950–956.  
800 <https://doi.org/10.1111/j.1558-5646.1998.tb01824.x>

801 Zheng, X., Levine, D., Shen, J., Gogarten, S. M., Laurie, C., & Weir, B. S. (2012). A high-  
802 performance computing toolset for relatedness and principal component analysis of SNP  
803 data. *Bioinformatics*, 28(24), 3326–3328. <https://doi.org/10.1093/bioinformatics/bts606>

804

805

806

807

808

809

810

811

812

813

814

815

816

817

818

819

820 Table 1. Weir & Cockerham's pairwise  $F_{ST}$  calculated with hierfstat between the Red River in  
821 the south basin, Matheson Island in the channel, and Dauphin River in the north basin for all 48  
822 walleye (*Sander vitreus*) sampled in both 2017 and 2018. 95% confidence intervals are provided  
823 in parentheses. Collection site locations are available in Figure 1. This analysis was performed  
824 with 52,372 Hardy-Weinberg Equilibrium filtered and linkage disequilibrium pruned, putatively  
825 neutral single nucleotide polymorphisms.

826

827

|                        | <b>Red River</b><br><b>(south basin)</b> | <b>Matheson Island</b><br><b>(channel)</b> | <b>Dauphin River</b><br><b>(north basin)</b> |
|------------------------|------------------------------------------|--------------------------------------------|----------------------------------------------|
| <b>Red River</b>       | -                                        | 0.0012 (0.0009–0.0016)                     | 0.0068 (0.0064–0.0074)                       |
| <b>Matheson Island</b> |                                          | -                                          | 0.0043 (0.0039–0.0048)                       |
| <b>Dauphin River</b>   |                                          |                                            | -                                            |

828

829

830

831

832

833

834

835

836

837

838

839 Table 2. Weir & Cockerham's Pairwise  $F_{ST}$  calculated with hierfstat between the Red River in  
840 the south basin, Matheson Island in the channel, and Dauphin River in the north basin.  $F_{ST}$   
841 values above the diagonal represent the 24 walleye (*Sander vitreus*) collected in 2017, and values  
842 below the diagonal represent the 24 collected in 2018. 95% confidence intervals are provided in  
843 parentheses. Collection site locations are available in Figure 1. This analysis was performed with  
844 52,372 Hardy-Weinberg Equilibrium filtered and linkage disequilibrium pruned, putatively  
845 neutral single nucleotide polymorphisms.

846

|                        | <b>Red River</b><br><b>(south basin)</b> | <b>Matheson Island</b><br><b>(channel)</b> | <b>Dauphin River</b><br><b>(north basin)</b> |
|------------------------|------------------------------------------|--------------------------------------------|----------------------------------------------|
| <b>Red River</b>       | -                                        | 0.0023 (0.0015–0.0031)                     | 0.0073 (0.0064–0.0082)                       |
| <b>Matheson Island</b> | 0.0019 (0.0011–0.0028)                   | -                                          | 0.0044 (0.0035–0.0052)                       |
| <b>Dauphin River</b>   | 0.0067 (0.0058–0.0077)                   | 0.0060 (0.0051–0.0070)                     | -                                            |

847

848

849

850

851

852 Table 3. Genes that vary along a latitudinal gradient in Lake Winnipeg walleye (*Sander vitreus*)  
853 with  $\geq 2$  outlier single nucleotide polymorphisms (SNPs) from pcadapt, each significant at a  
854 Benjamini-Hochberg adjusted  $p$ -value  $< 0.05$  (PC1 in Figure 4). SwissProt gene names and  
855 corresponding proteins are provided, and general cellular location or function of these genes are  
856 described in Summary Function. This analysis was performed using a set of 222,634 single  
857 nucleotide polymorphisms (SNPs) not filtered for Hardy-Weinberg Equilibrium or pruned for  
858 linkage disequilibrium, unlike the putatively neutral set of SNPs used for population structure  
859 analyses.

| SwissProt Gene Name | Protein                                              | Summary Function |
|---------------------|------------------------------------------------------|------------------|
| <b>ABCA12</b>       | ATP-binding cassette sub-family A member 12          | Cell Membrane    |
| <b>ANK3</b>         | Ankyrin-3                                            | Cell Membrane    |
| <b>atp1a3</b>       | Sodium/potassium-transporting ATPase subunit alpha-3 | Cell Membrane    |
| <b>CLDN10</b>       | Claudin-10                                           | Cell Membrane    |
| <b>Prf1</b>         | Perforin-1                                           | Cell Membrane    |



|                 |                                                                            |                          |
|-----------------|----------------------------------------------------------------------------|--------------------------|
| <b>SLC9A6</b>   | Sodium/hydrogen exchanger 6                                                | Cell<br>Membrane         |
| <b>CRYBG1</b>   | Beta/gamma crystallin domain-containing protein 1                          | Cytoskeleton             |
| <b>IFI44</b>    | Interferon-induced protein 44                                              | Cytoskeleton             |
| <b>MYH9</b>     | Myosin-9                                                                   | Cytoskeleton             |
| <b>TUBB4B</b>   | Tubulin beta-4B chain                                                      | Cytoskeleton             |
| <b>DNASE1L1</b> | Deoxyribonuclease-1-like 1                                                 | DNase                    |
| <b>EIF4G1</b>   | Eukaryotic translation initiation factor 4 gamma 1                         | Expression<br>regulation |
| <b>srebf2</b>   | Sterol regulatory element-binding protein 2                                | Expression<br>regulation |
| <b>Znf879</b>   | Zinc finger protein 879                                                    | Expression<br>regulation |
| <b>CLPX</b>     | ATP-dependent Clp protease ATP-binding subunit<br>clpX-like, mitochondrial | Protease                 |
| <b>CXCR3</b>    | C-X-C chemokine receptor type 3                                            | Signaling                |
| <b>MATK</b>     | Megakaryocyte-associated tyrosine-protein kinase                           | Signaling                |
| <b>Ralgds</b>   | Ral guanine nucleotide dissociation stimulator                             | Signaling                |
| <b>Pol</b>      | LINE-1 retrotransposable element ORF2 protein                              | Transposable<br>Element  |

860

861

862

863

864 Table 4. Genes that vary between 2017 and 2018 in Lake Winnipeg walleye (*Sander vitreus*)  
865 with transcripts containing  $\geq 2$  outlier single nucleotide polymorphisms (SNPs) from pcdapt,  
866 each SNP significant at a Benjamini-Hochberg adjusted  $p$ -value  $< 0.05$  (PC2 in Figure 4).  
867 SwissProt gene names and corresponding proteins are provided, and general cellular location or  
868 function of these genes are described in Summary Function. This analysis was performed using a  
869 set of 222,634 single nucleotide polymorphisms (SNPs) not filtered for Hardy-Weinberg  
870 Equilibrium or pruned for linkage disequilibrium, unlike the putatively neutral set of SNPs used  
871 for population structure analyses.

| SwissProt Gene    | Protein                                                     | Summary Function      |
|-------------------|-------------------------------------------------------------|-----------------------|
| <b>Name</b>       |                                                             |                       |
| <b>Gp1bb</b>      | Platelet glycoprotein Ib beta chain                         | Cell Adhesion         |
| <b>MFAP4</b>      | Microfibril-associated glycoprotein 4                       | Cell Adhesion         |
| <b>BTG3</b>       | Protein BTG3                                                | Cell Division         |
| <b>Ppp6c</b>      | Serine/threonine-protein phosphatase 6 catalytic subunit    | Cell Division         |
| <b>Slc12a3</b>    | Solute carrier family 12 member 3                           | Cell Membrane         |
| <b>MMD</b>        | Monocyte to macrophage differentiation factor               | Expression regulation |
| <b>Srsf10</b>     | Serine/arginine-rich splicing factor 10                     | Expression regulation |
| <b>Ube2a</b>      | Ubiquitin-conjugating enzyme E2 A                           | Expression regulation |
| <b>Znf18</b>      | Zinc finger protein 18                                      | Expression regulation |
| <b>St6galnac2</b> | Alpha-N-acetylgalactosaminide alpha-2,6-sialyltransferase 2 | Protein Modification  |

|               |                                                                        |                        |
|---------------|------------------------------------------------------------------------|------------------------|
| <b>MYO9A</b>  | Unconventional myosin-IXa                                              | Signaling/Cytoskeleton |
| <b>Pol</b>    | LINE-1 retrotransposable element ORF2 protein                          | Transposable Element   |
| <b>RTase</b>  | Probable RNA-directed DNA polymerase from transposon BS                | Transposable Element   |
| <b>TC1A</b>   | Transposable element Tc1 transposase                                   | Transposable Element   |
| <b>TN6</b>    | Putative transposase in <i>Dicentrarchus labrax</i> (European seabass) | Transposable Element   |
| <b>TY3B-G</b> | Transposon Ty3-G Gag-Pol polyprotein                                   | Transposable Element   |
| <b>YTX2</b>   | Transposon TX1 uncharacterized protein (Fragment)                      | Transposable Element   |

872

873

874

875

876

877

878

879

880

881

882

883

884 Figure 1. Sampling locations within Lake Winnipeg. Eight walleye (*Sander vitreus*) per year and  
885 per spawning site were collected, for  $n = 48$  fish over 2017 and 2018. The Red River represents  
886 the south basin, Matheson Island represents the channel connecting the two lake basins, and the  
887 Dauphin River represents the north basin.

888

889 Figure 2. Representative Structure runs from ten replicates testing  $K = 2-5$ , organized by  
890 collection site (Red River in the south basin, Matheson Island in the channel, and Dauphin River  
891 in the north basin) and year collected (2017 and 2018) for all walleye (*Sander vitreus*) used in  
892 the present study. Collection site locations are available in Figure 1. This analysis was performed  
893 with 52,372 Hardy-Weinberg Equilibrium filtered and linkage disequilibrium pruned, putatively  
894 neutral single nucleotide polymorphisms.

895

896 Figure 3. Membership probability plot of discriminant analysis of principal components using  
897 prior collection site information (Red River in the south basin, Matheson Island in the channel,  
898 and Dauphin River in the north basin) on walleye (*Sander vitreus*) collected over 2017 and 2018,  
899 performed using Adegnet. Collection site locations are available in Figure 1. This analysis was  
900 performed with 52,372 Hardy-Weinberg Equilibrium filtered and linkage disequilibrium pruned,  
901 putatively neutral single nucleotide polymorphisms.

902

903 Figure 4. Principal Components Analysis implemented in pcadapt with color showing site  
904 collected (red for Red River in the south basin, yellow Matheson Island in the channel, and blue  
905 Dauphin River in the north basin), circles showing walleye (*Sander vitreus*) collected in 2017,

906 and triangles showing walleye collected in 2018. Collection site locations are available in Figure  
907 1. This analysis was performed using a set of 222,634 single nucleotide polymorphisms (SNPs)  
908 filtered for quality, minor allele frequency  $> 0.05$ , and a maximum of two out of 48 missing  
909 individuals, but not filtered for Hardy-Weinberg Equilibrium or pruned for linkage  
910 disequilibrium. These SNPs are, thus, more likely to represent patterns of adaptive variation in  
911 the system, and outlier analyses were performed using this set of SNPs. Principal Component 1  
912 (PC1) represents a latitudinal gradient, while Principal Component 2 (PC2) represents a genetic  
913 divergence between sampling years. Outlier SNPs that contribute to each of these axes were  
914 selected for functional analyses (Tables 3, 4, 5), with 386 SNPs contributing to PC1 and 791  
915 SNPs contributing to PC2, significant at Benjamini-Hochberg adjusted  $p$ -values  $< 0.05$ .  
916

917

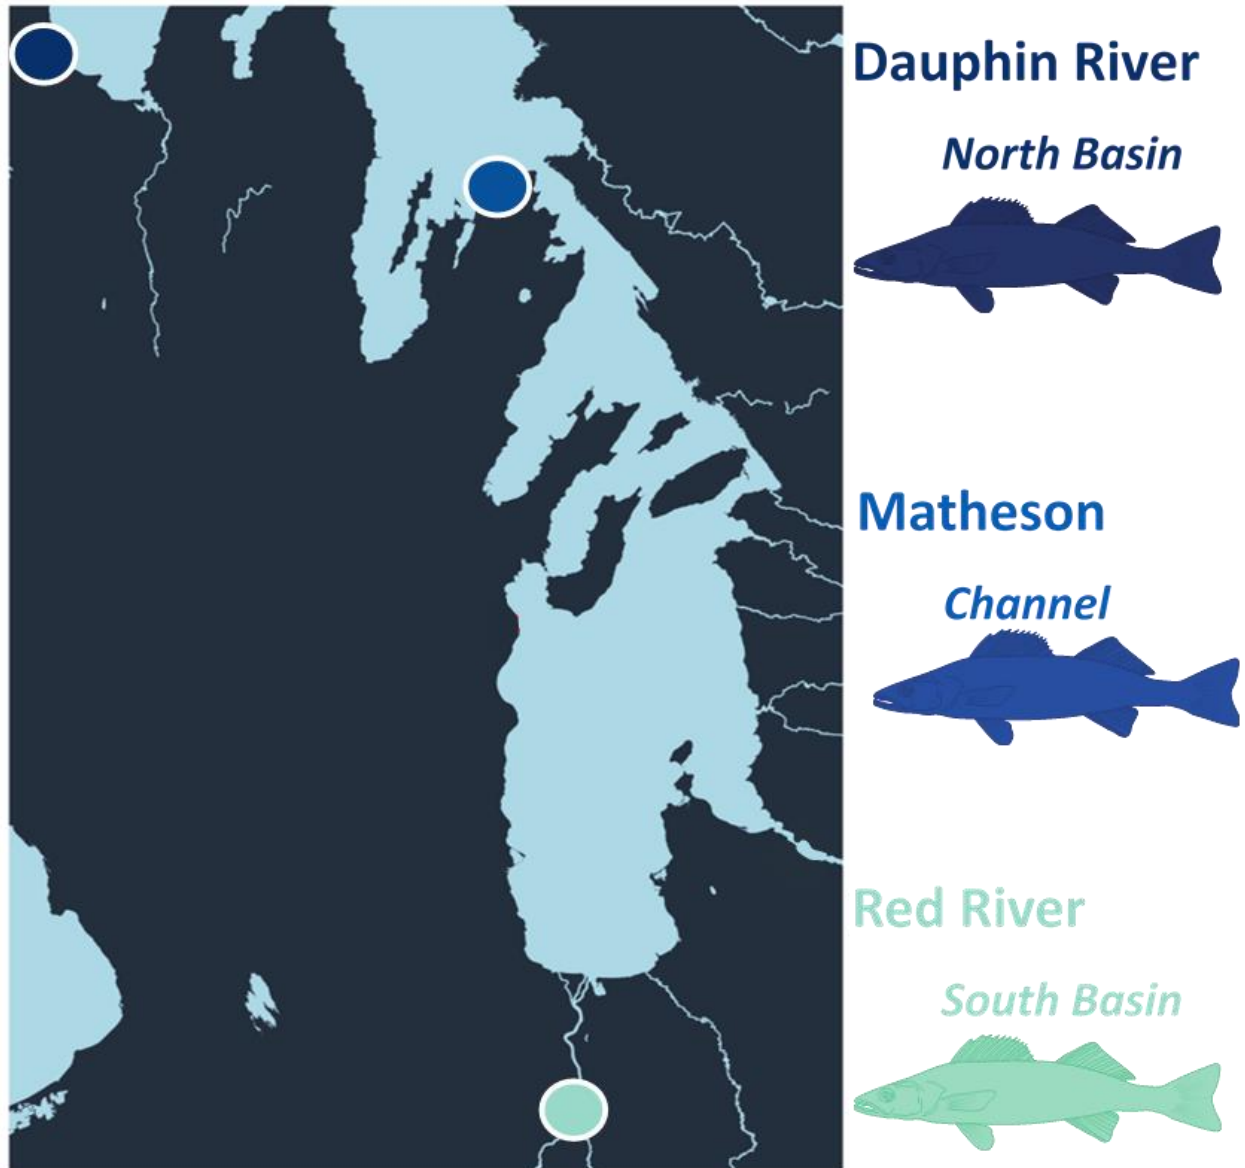

918

919

920

921

922

923

924

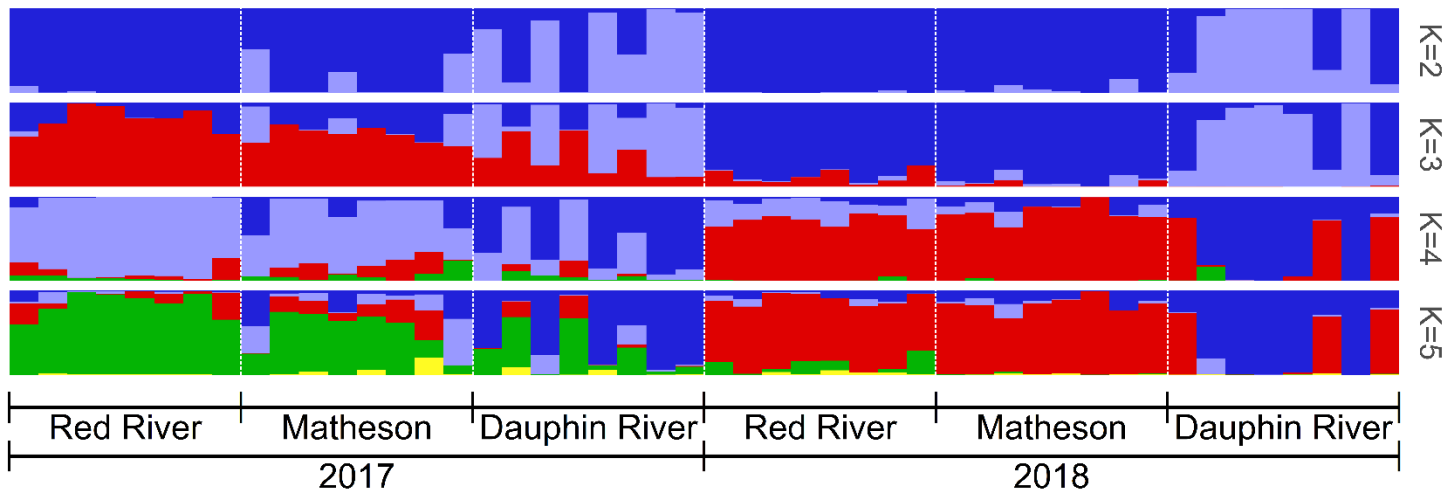



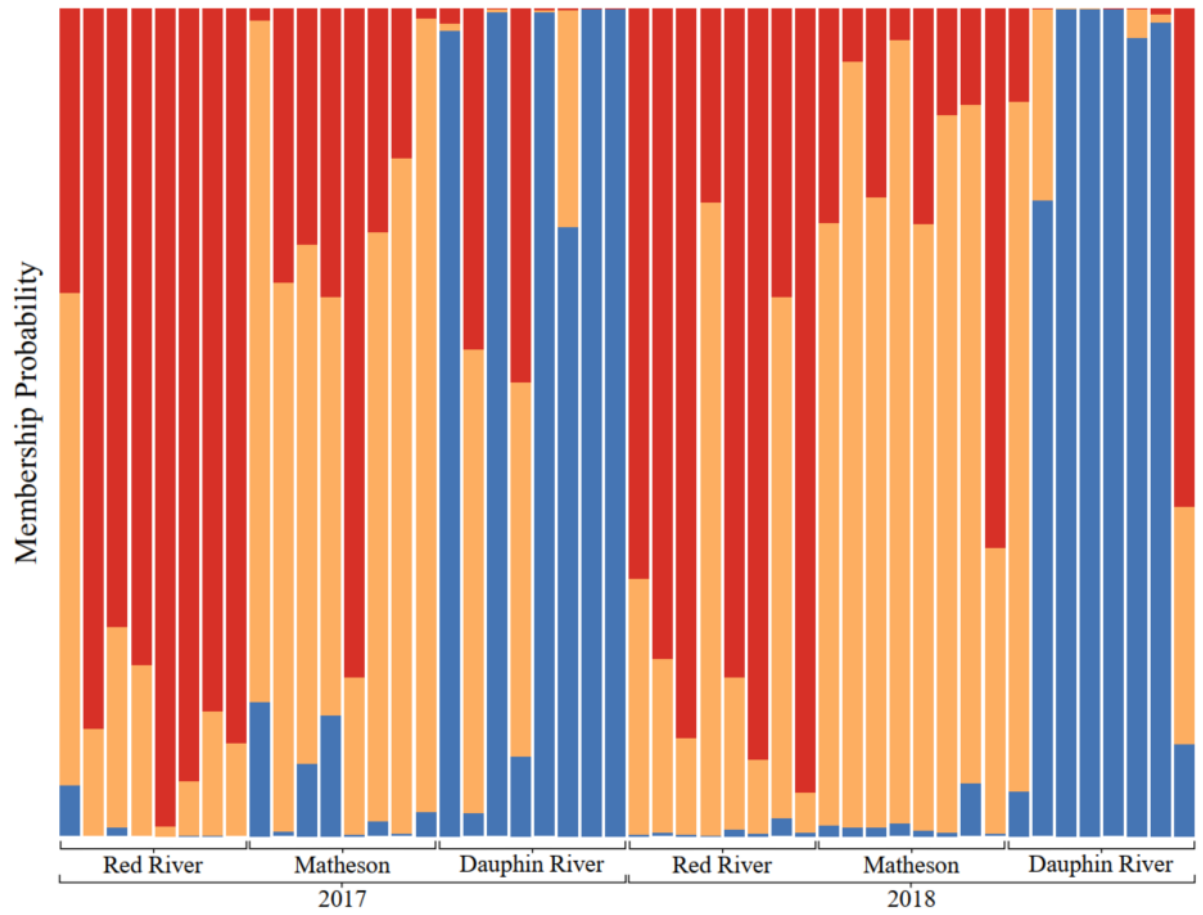

925

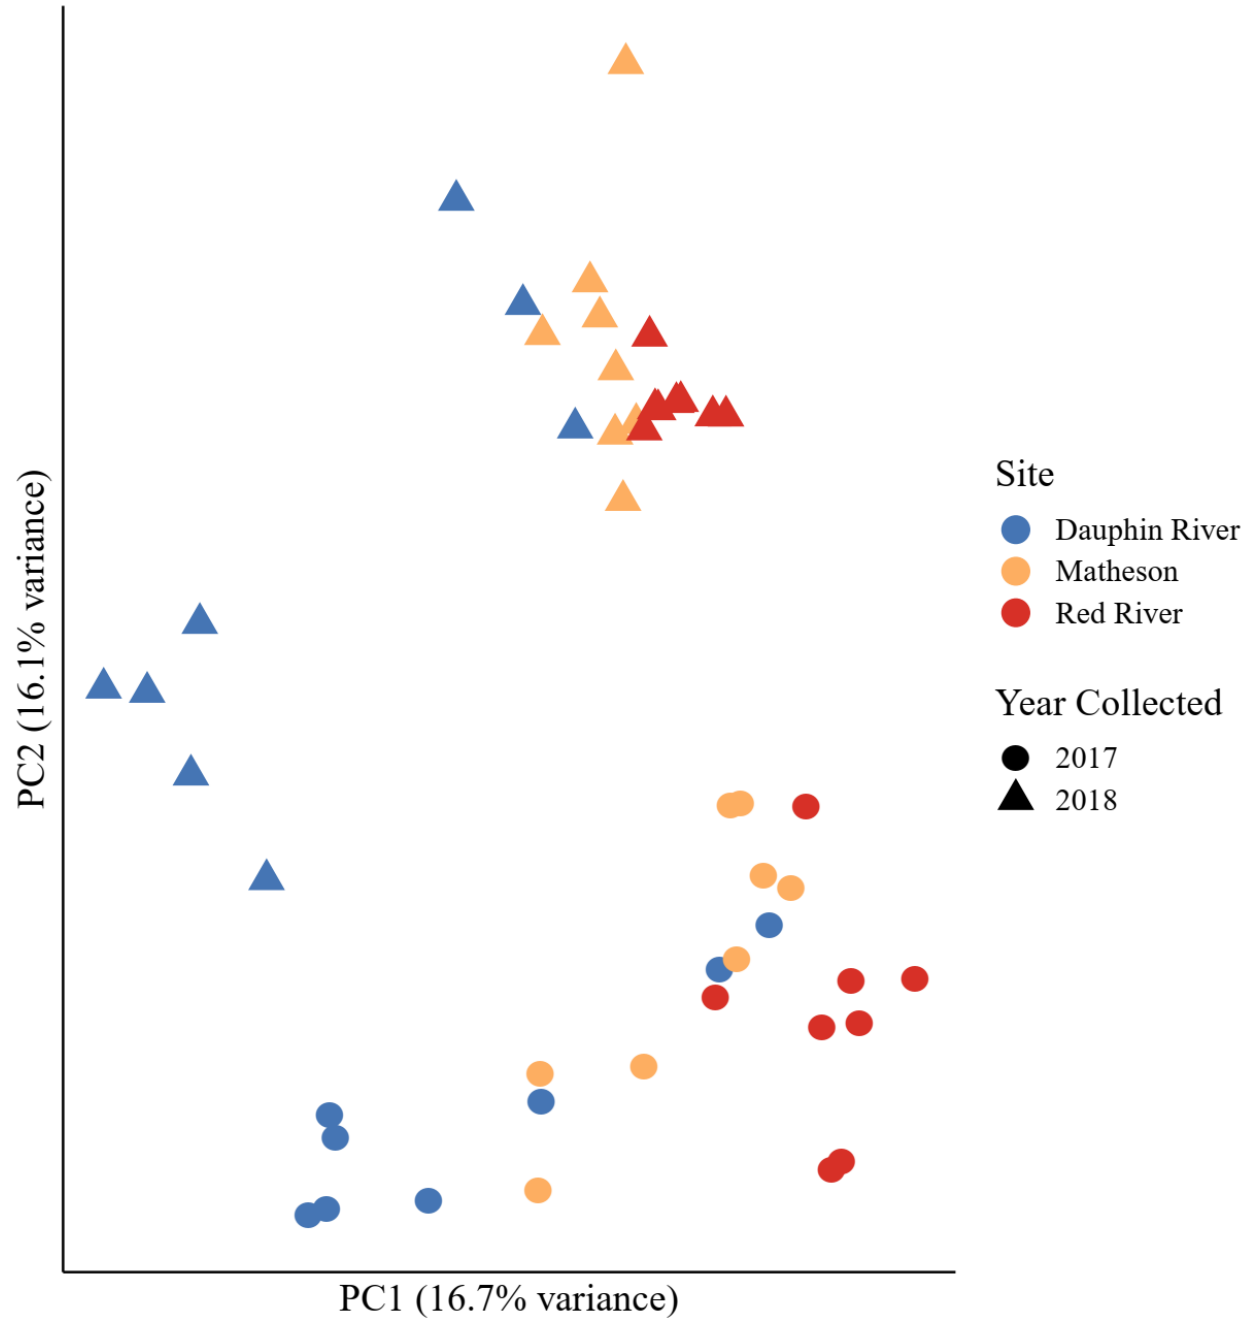

926
